# Supplementary material for: Survey on Carbapenem-Resistant Bacteria in Pigs at Slaughter and Comparison with Human Clinical Isolates in Italy
Source: MDPI journal article supplement (doi:10.3390/antibiotics11060777), 2022-06-07
Supplement: s1 [file s1]

| #File     | Nseq | Nres    | A       | C       | G       | T       | N | %GC    |  |
|-----------|------|---------|---------|---------|---------|---------|---|--------|--|
| CRE102_S1 | 225  | 6438088 | 1081364 | 2138874 | 2136192 | 1081658 | 0 | 66.40% |  |
| CRE153_S5 | 317  | 6396234 | 1071728 | 2118782 | 2130452 | 1075272 | 0 | 66.43% |  |
| CRE295_S1 | 141  | 6426083 | 1068292 | 2102630 | 2161004 | 1094157 | 0 | 66.35% |  |
| CRE98_S1C | 124  | 6415664 | 1080533 | 2126693 | 2133348 | 1075090 | 0 | 66.40% |  |
| NEF-156_S | 172  | 7099705 | 1212066 | 2332328 | 2343073 | 1212238 | 0 | 65.85% |  |
| NEF23_S7_ | 201  | 6436450 | 1079465 | 2134215 | 2139549 | 1083221 | 0 | 66.40% |  |

| Min | Q25  | Med   | Q75   | Max    | N50    | N75   | N90   | L50 |
|-----|------|-------|-------|--------|--------|-------|-------|-----|
| 237 | 934  | 9658  | 36103 | 238923 | 75398  | 42989 | 21385 | 25  |
| 253 | 4204 | 11727 | 25462 | 223278 | 38674  | 20193 | 10835 | 47  |
| 255 | 780  | 20157 | 66543 | 328392 | 102638 | 62745 | 33838 | 19  |
| 255 | 999  | 18002 | 69871 | 561477 | 126411 | 75855 | 37989 | 13  |
| 250 | 721  | 6722  | 53532 | 340617 | 123256 | 75109 | 33598 | 18  |
| 239 | 995  | 10914 | 47273 | 377949 | 79626  | 49438 | 23837 | 23  |

| L75 | L90 |
|-----|-----|
| 53  | 86  |
| 105 | 167 |
| 38  | 59  |
| 30  | 46  |
| 36  | 57  |
| 49  | 76  |
